# Supplementary material
Source: PubMed Central journal article supplement (PMC3271181)
Supplement: NIHMS338202-supplement-2.pdf [file NIHMS338202-supplement-2.pdf]

## **Supplemental Tables**

**Table S1: antibodies used in this study**

|                     | <b>Dilution</b> | <b>Supplier</b>             | <b>Catalog number</b> |
|---------------------|-----------------|-----------------------------|-----------------------|
| MyoD                | 1:100           | Santa CruzBiotechnology Inc | Sc-304                |
| Myogenin            | 1:100           | Santa CruzBiotechnology Inc | Sc-578                |
| Akt                 | 1:1000          | Cell Signaling              | 4685                  |
| p-Akt               | 1:1000          | Cell Signaling              | 9271                  |
| p-S6                | 1:1000          | Cell Signaling              | 2211                  |
| S6                  | 1:1000          | Cell Signaling              | 2217                  |
| p-S6kinase          | 1:1000          | Cell Signaling              | 9205                  |
| pGSK3a/b (Ser219)   | 1:500           | Cedarlane                   | 9331                  |
| Active beta-catenin | 1:250           | Millipore corp.             | 05-665                |
| Myosin heavy chain  | 1:200           | Sigma                       | M7523                 |
| Tubulin             | 1:5000          | Sigma                       | T9026                 |
| pIGF receptor       | 1:1000          | Cell Signaling              | 6113                  |
| pIRS1               | 1:1000          | Cell Signaling              | 2388                  |
| IGF receptor        | 1:1000          | Cell Signaling              | 3027                  |
| IRS1                | 1:1000          | Cell Signaling              | 2382                  |
| pPI3Kinase p85      | 1:1000          | Cell Signaling              | 4228                  |
| PI3Kinase p85       | 1:1000          | Cell Signaling              | 4257                  |
| HA-tag              | 1:250           | Roche                       | 1583816               |
| Laminin             | 1:1000          | Sigma                       | 9393                  |
| Foxo1               | 1:1000          | Cell Signaling              | 9454                  |
| Foxo3a              | 1:1000          | Cell Signaling              | 9467                  |
| p-Foxo1/Foxo3a      | 1:1000          | Cell Signaling              | 9464                  |
| p-PKC               | 1:1000          | Cell Signaling              | 9371                  |
| p-CamKII            | 1:1000          | Cell Signaling              | 3361                  |
| Phospho-c-Jun       | 1:1000          | Cell Signaling              | 3270                  |
| G protein alpha S   | 1:1000          | AbCam                       | cb83735               |

**Table S2: Primers used in this study**

| <b>Primer</b>    | <b>Sequence 5'-3'</b>             |
|------------------|-----------------------------------|
| IGF-receptor USP | CAA GCT GTG TGT CTC CGA AA        |
| IGF-receptor DSP | TGA TTC GGT TCT TCC AGG TC        |
| IGF-1Ea USP      | TGA CAT GCC CAA GAC TCA           |
| IGF-1Ea DSP      | TGT GGC ATT TTC TGC TC GTG G      |
| MGF USP          | AGC TGC AAA GGA GAA GGA AAG GAA G |
| MGF DSP          | GGT GAT GTG GCA TTT CCT GCT       |
| Myogenin USP     | CAG TAC ATT GAG CGC CTA C         |
| Myogenin DSP     | AAG GCA ACA GAC ATA TCC TC        |
| MyoD USP         | CTA CAG TGG CGA CTC AGA T         |
| MyoD DSP         | CAC TGT AGT AGG CGG TGT C         |
| Fzd7 USP         | GCTTCCTAGGTGAGCGTGAC              |
| Fzd7 DSP         | AACCCGACAGGAAGATGATG              |
| Vangl2 USP       | CCCCAGTTCACACTCAAGGT              |
| Vangl2 DSP       | ACTTGGGCAGGTTGAGGAG               |
| Gapdh USP        | ATGCCAGTGAGCTTCCCGTC              |
| Gapdh DSP        | CATCACCATCTTCCAGGAGC              |
| Fzd3 USP         | CCTTGAGGATGTGCCAAGAT              |
| Fzd3 DSP         | GCTATAGGCACGCTGACACA              |
| GNAS1 USP        | AACTGGAGGAGGAGAAGATG              |
| GNAS2 USP        | TCAGGTTGTTTTTGATGTCC              |

**Table S3: siRNA sequences used in this study**

| siRNA ID           | directed<br>against | sequence                    |
|--------------------|---------------------|-----------------------------|
| ID dd66302, Ambion | Fzd3                | CAAGAUUCCGUUACCCUGAtt       |
| ID s66314          | Fzd7                | GUGCUUUACUUCUUCGGUAtt       |
| ID s96802          | Vangl2              | GCUUGGUAGUGAGCACCAAtt       |
| SiRNA pool:        | GNAS1               |                             |
| SR301848A          |                     | UGAAACGUAAUUGUACAAGDAGUTA   |
| SR301848B          |                     | CAACCUGAAAGAGGCGAUUGAAACC   |
| SR301848B          |                     | CGAACGCUCCAACGAGAGUACCAGATG |
