# Supplementary material
Source: PubMed Central journal article supplement (PMC3271181)

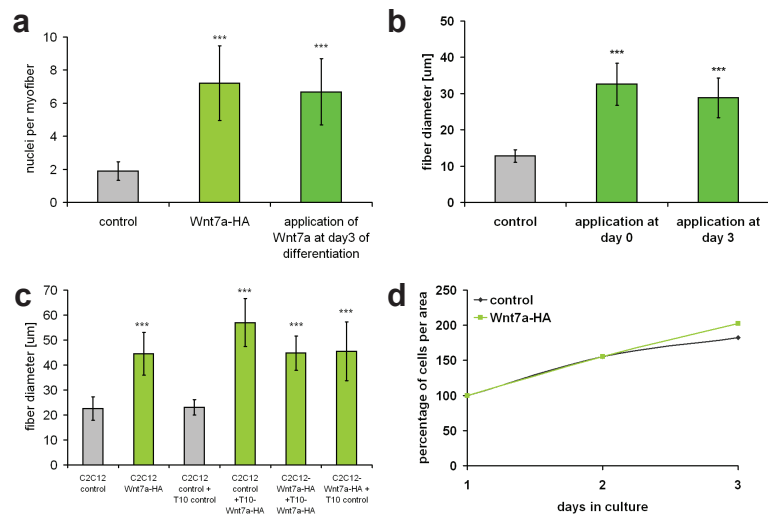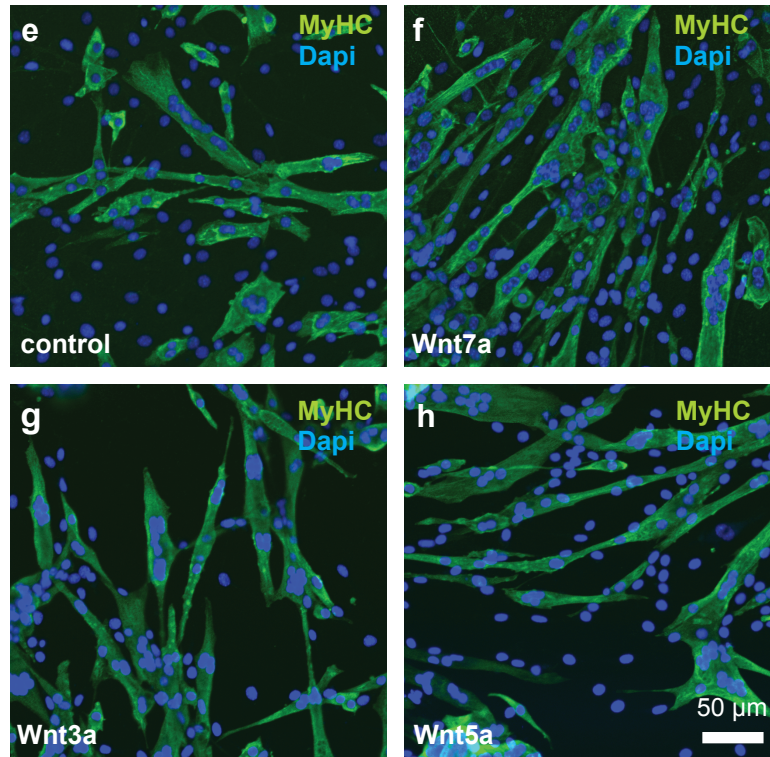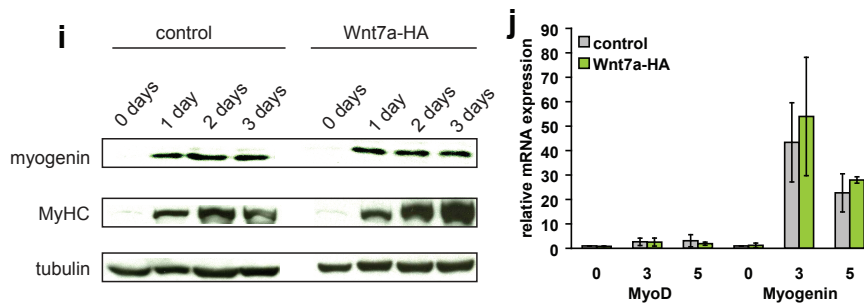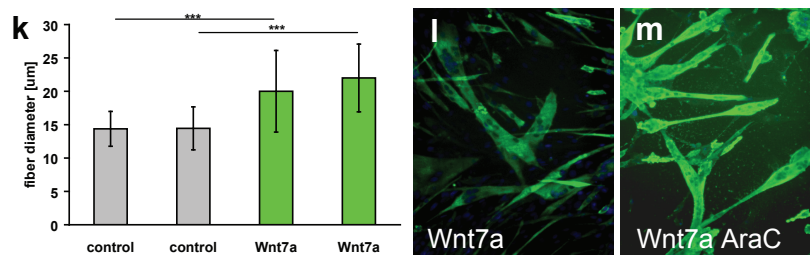

Supplement: NIHMS338202-supplement-4.pdf [file NIHMS338202-supplement-4.pdf]

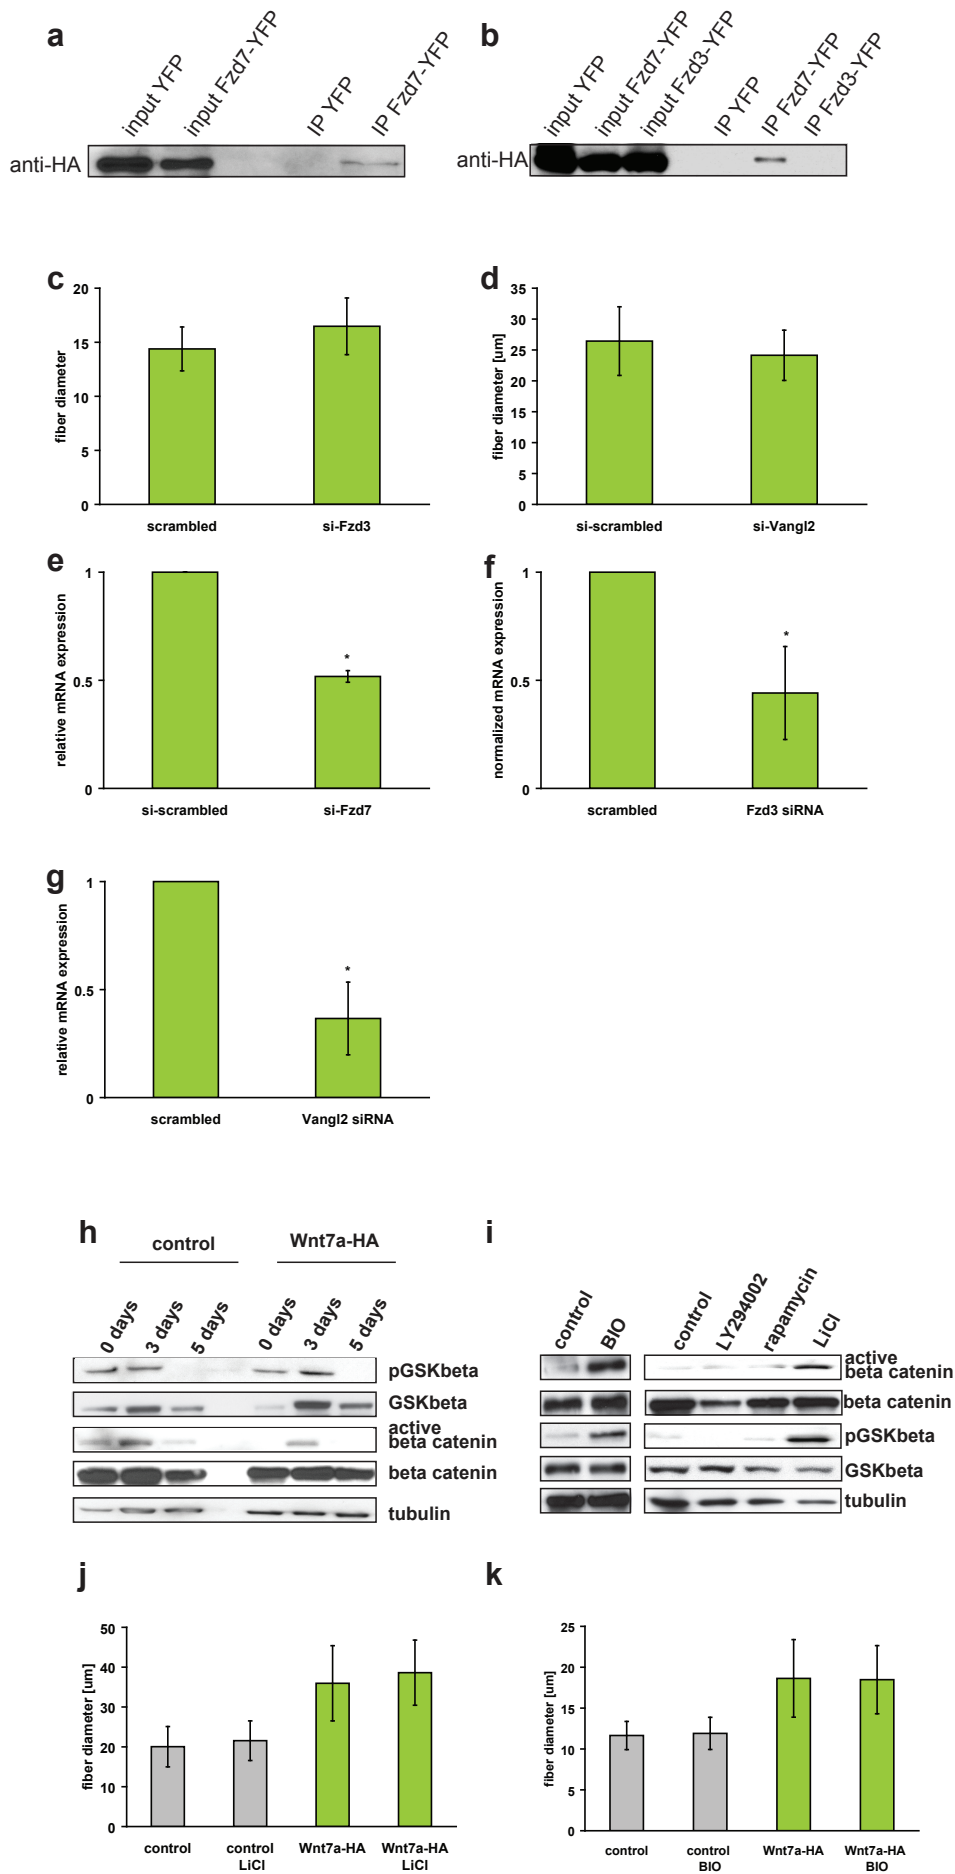

Supplemental figure 2 von Maltzahn et al., 2011

Supplement: NIHMS338202-supplement-5.pdf [file NIHMS338202-supplement-5.pdf]

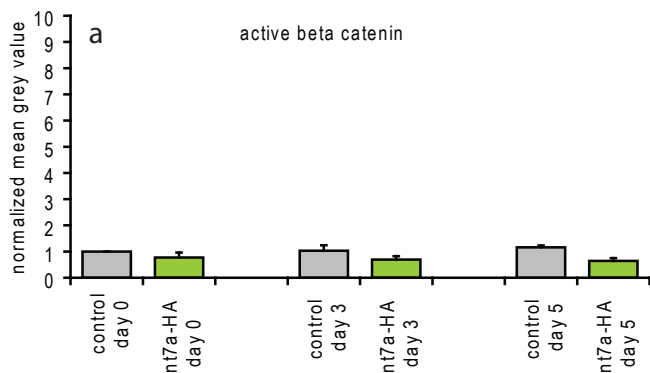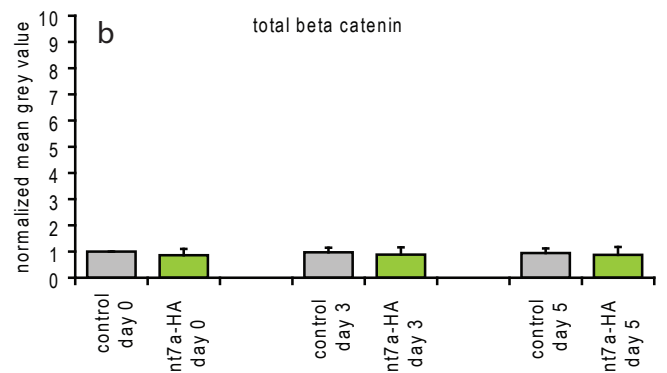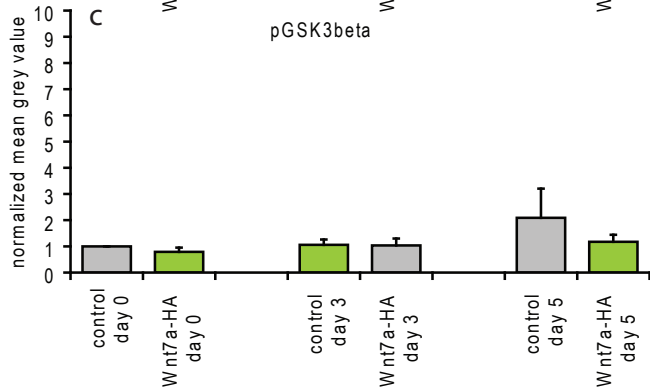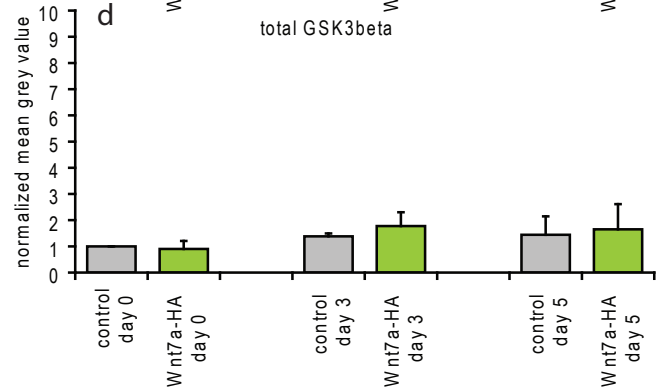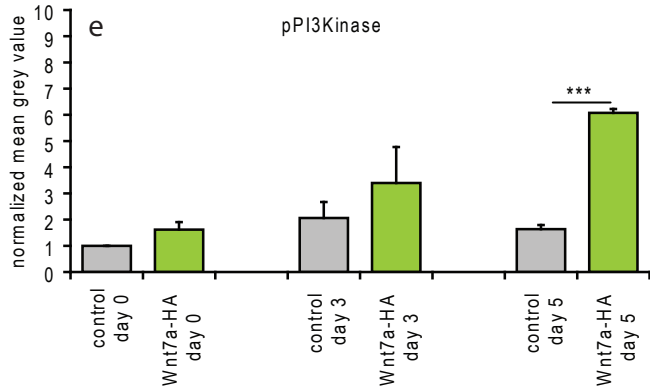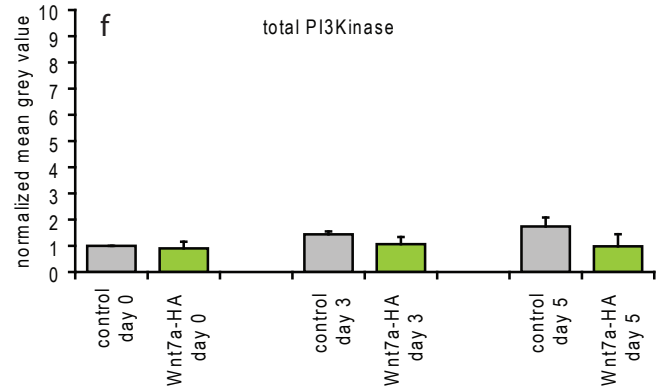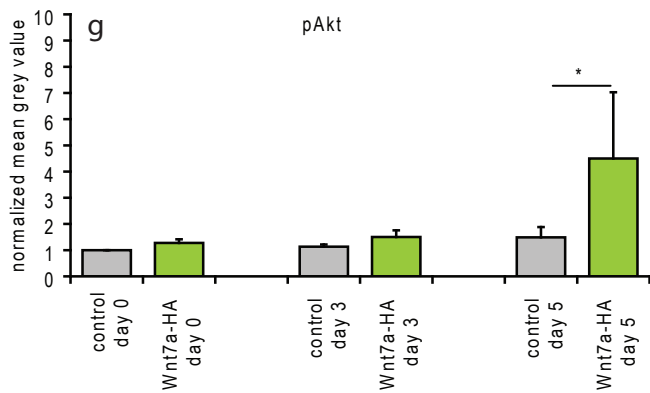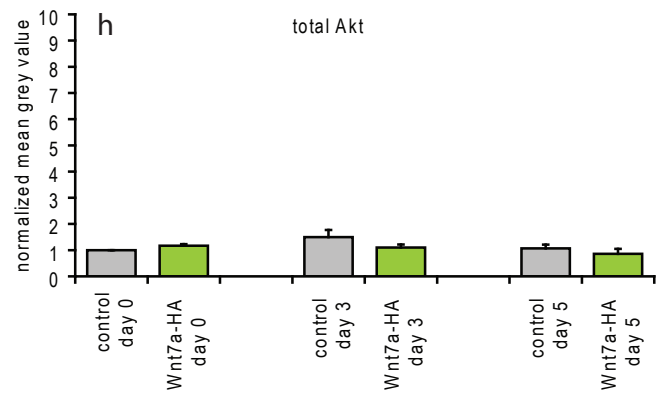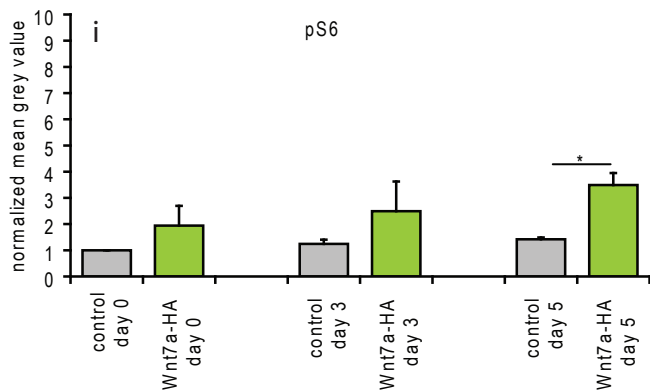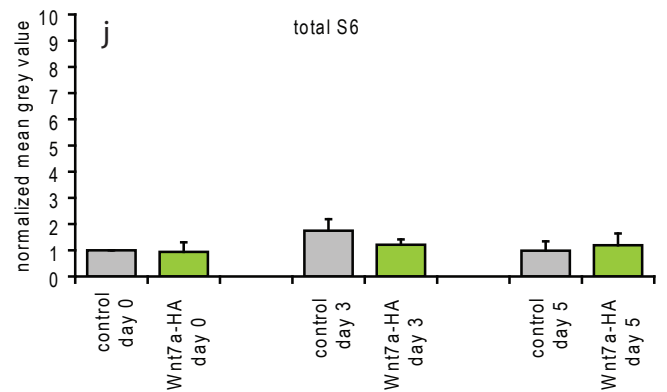

Supplemental figure 3, von Maltzahn et al., 2011

Supplement: NIHMS338202-supplement-6.pdf [file NIHMS338202-supplement-6.pdf]

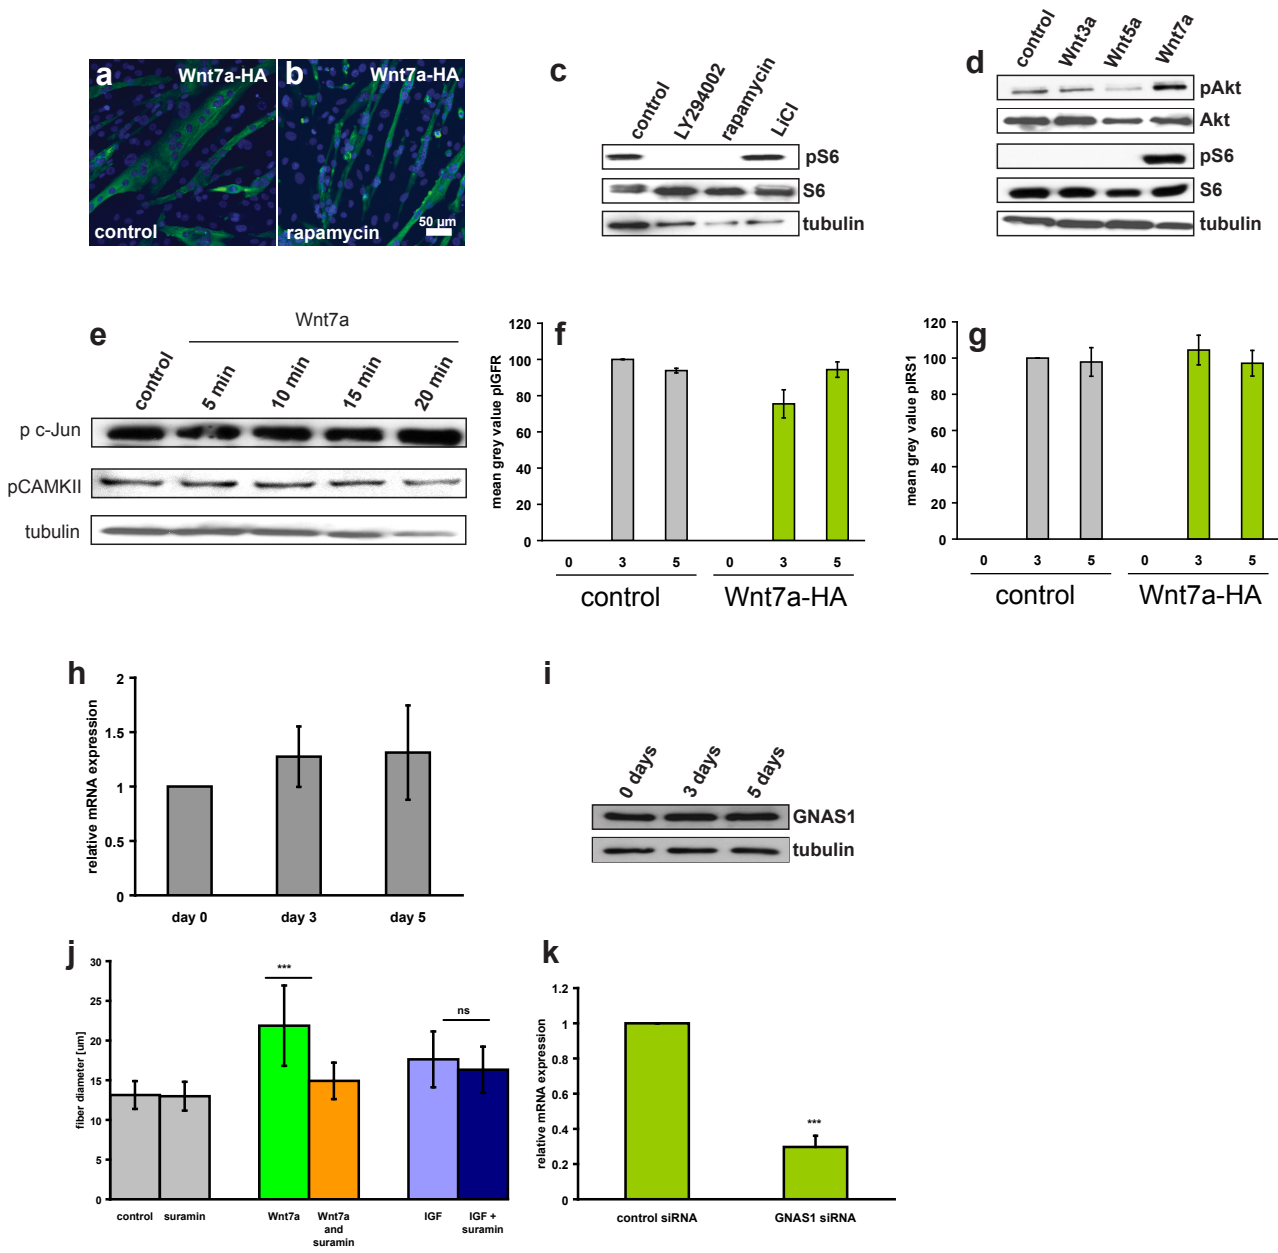

Supplemental figure 4 von Maltzahn et al., 2011

Supplement: NIHMS338202-supplement-7.pdf [file NIHMS338202-supplement-7.pdf]

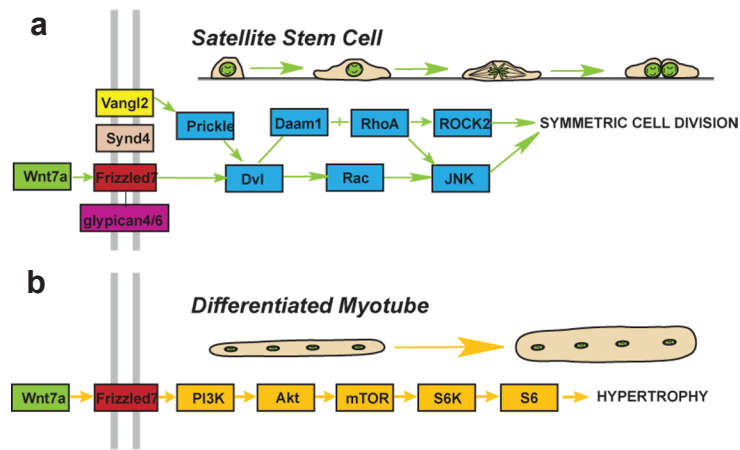

Supplemental Figure 5, von Maltzahn et al., 2011

Supplement: NIHMS338202-supplement-8.pdf [file NIHMS338202-supplement-8.pdf]

Fig. 3a

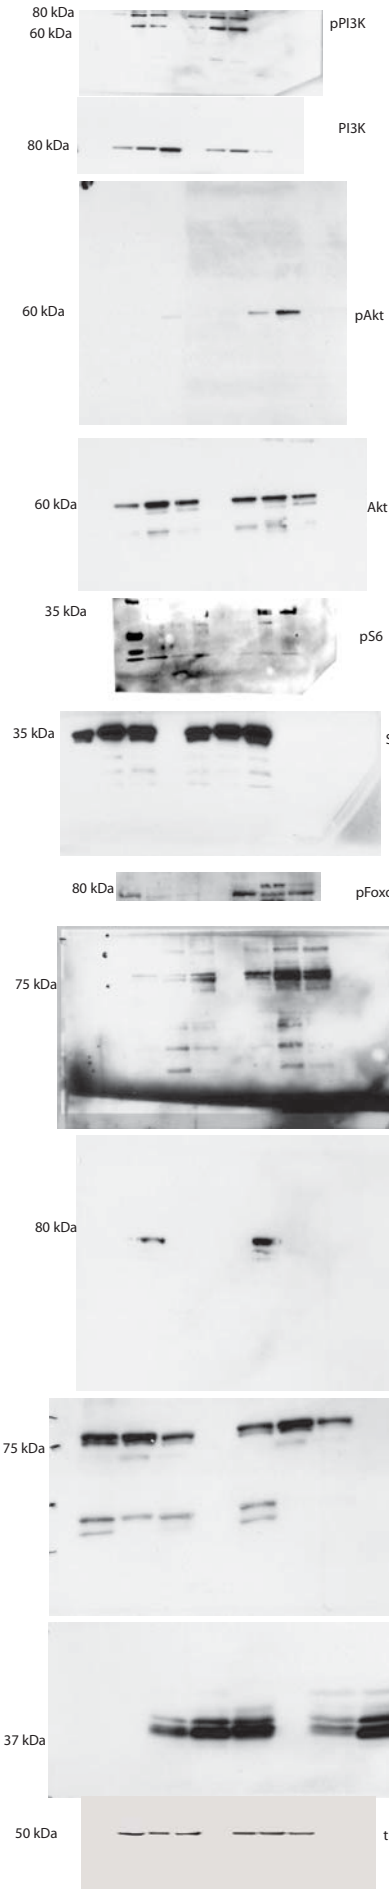

Fig. 3b

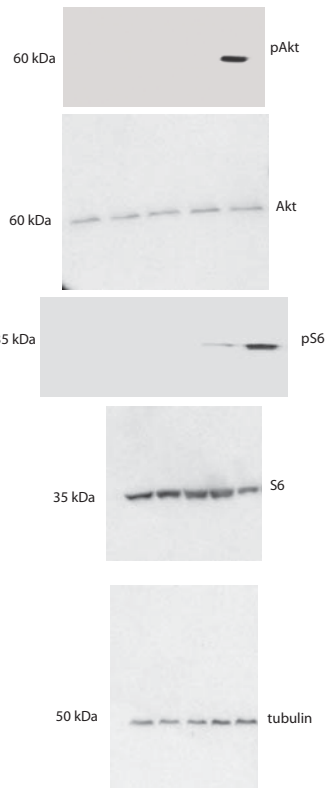

Fig. 3c

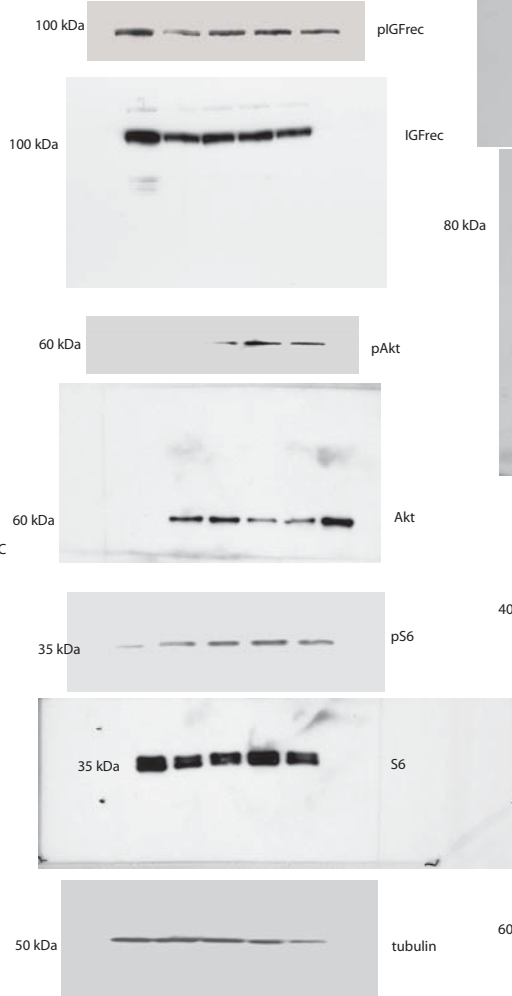

Fig. 4a

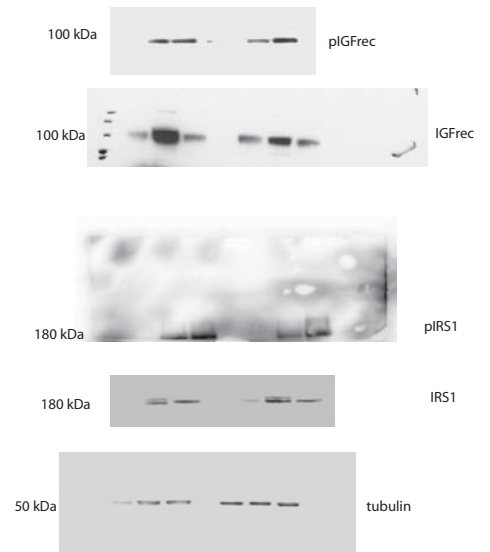

Fig. 5a

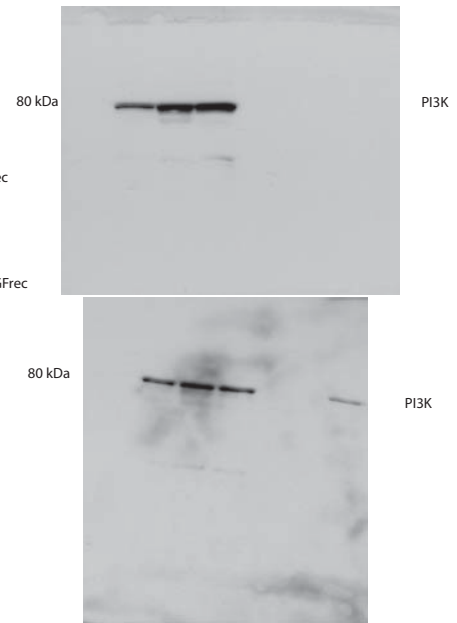

Fig. 5c

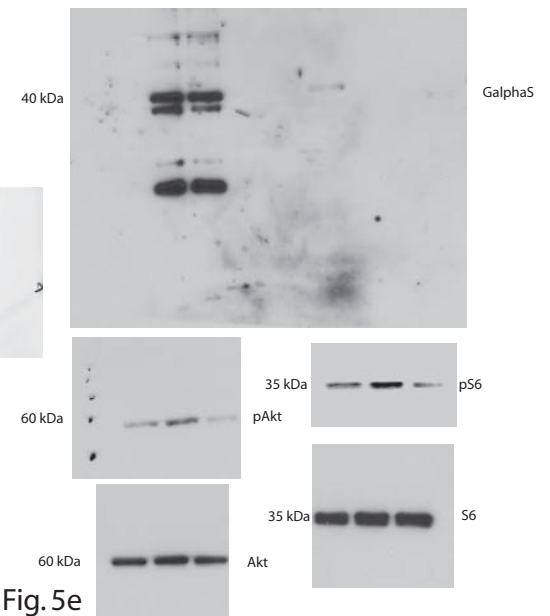

Fig. 5e

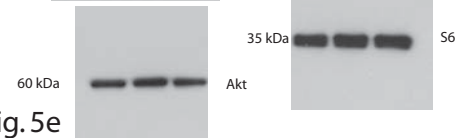

Supplement: NIHMS338202-supplement-9.pdf [file NIHMS338202-supplement-9.pdf]
